# Supplementary material for: Glycerol photoelectrochemical oxidation reaction at carbon nitrides/BiVO4 materials
Source: publisher site journal article supplement (doi:10.3762/bjnano.17.57), 2026-06-17
Supplement: Additional file 1 [file 2190-4286-17-57-S1.pdf]

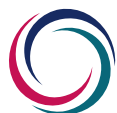

## Supporting Information

for

### **Glycerol photoelectrochemical oxidation reaction at carbon nitrides/BiVO<sub>4</sub> materials**

Charles Garcia da Cunha, Isabelle M. D. Gonzaga, Cristian Hessel, Izadora F. Reis, Ivo F. Teixeira, Lucia H. Mascaro and Elton Sitta

*Beilstein J. Nanotechnol.* **2026**, *17*, 806–817. [doi:10.3762/bjnano.17.57](https://doi.org/10.3762/bjnano.17.57)

## Additional figures

## 1 – Bandgap energy estimation

The Tauc equation is given by:

$$(\alpha h\nu)^{1/n} = (h\nu - E_g) \quad (\text{S1})$$

in which  $\alpha$  is the absorption coefficient (proportional to the absorbance),  $E_g$  is the optical bandgap energy,  $h\nu$  is the energy of the incident photons, and  $n$  represents the type of electronic transition. Herein,  $n = 1/2$  was used for direct allowed transitions and  $n = 2$  for indirect allowed transitions.

## 2 – Experimental Setup

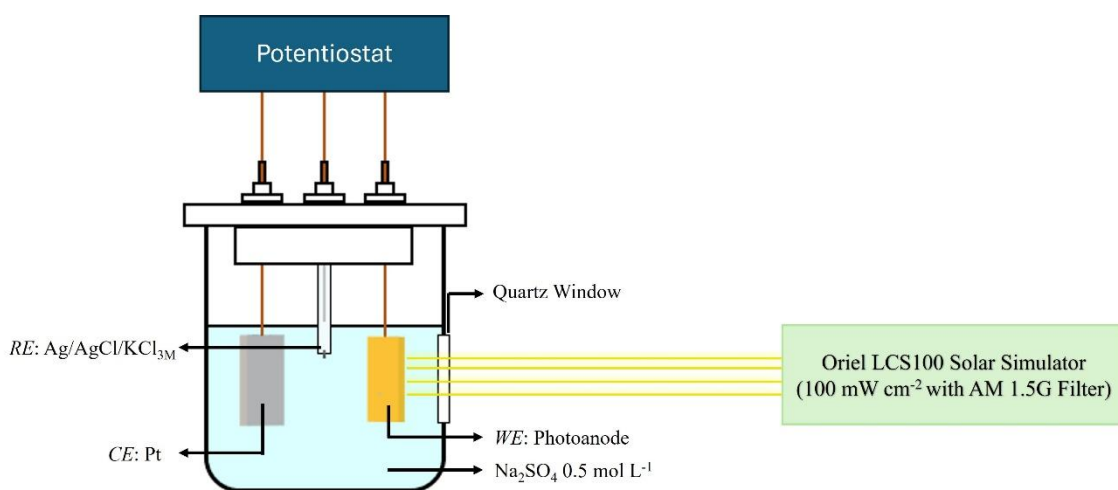

**Figure S1:** Experimental setup employed for photoelectrochemical experiments.

### 3 – Physical Characterization

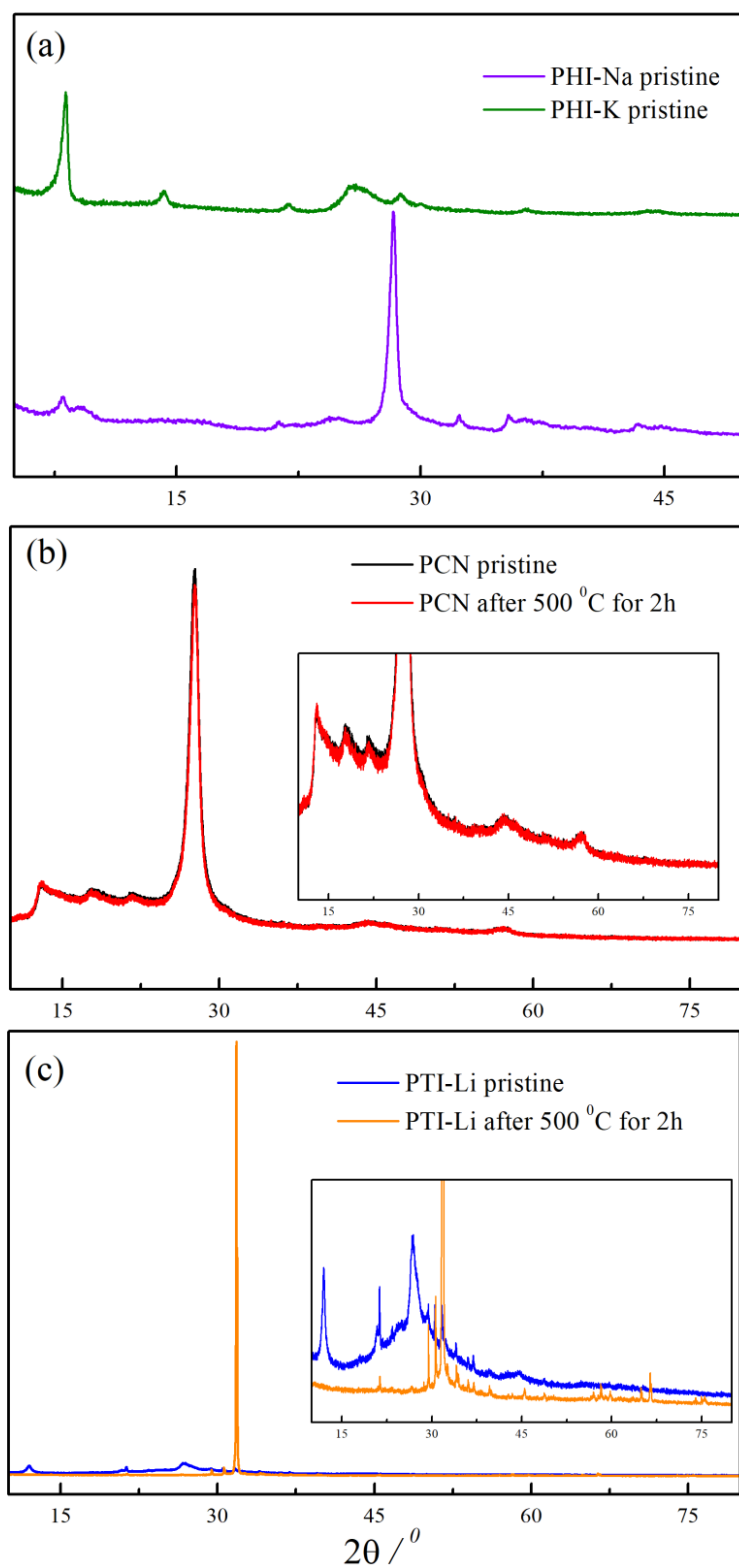

**Figure S2:** X-ray diffraction patterns for PHI-Na and PHI-K (a), PCN (b), and PTI-Li (c). PCN and PTI-Li XRD were analyzed for both pristine materials and after thermal treatment at 500 °C for 2 h.

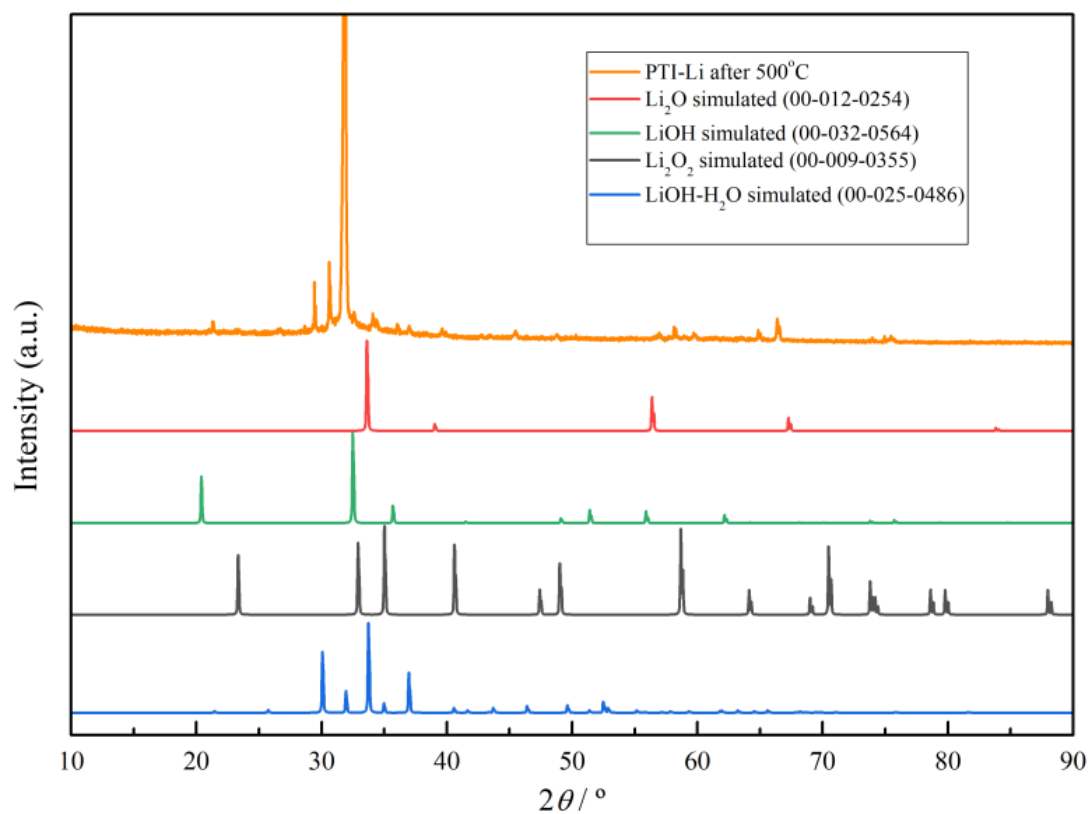

**Figure S3:** X-ray diffraction patterns for PTI-Li after thermal treatment at 500 °C for 2 h and for some lithium (hydro)oxides.

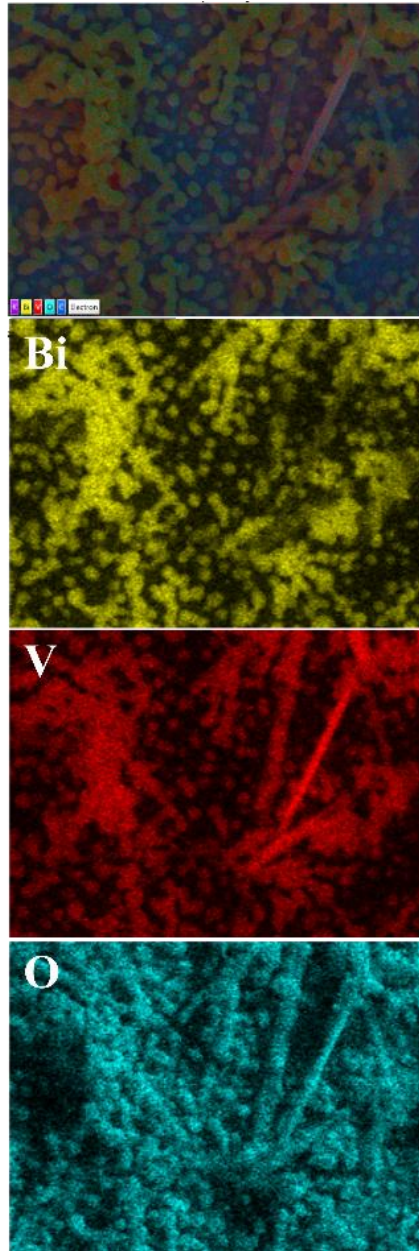

Figure S4: SEM-EDS for PTI-Li/BiVO<sub>4</sub>.

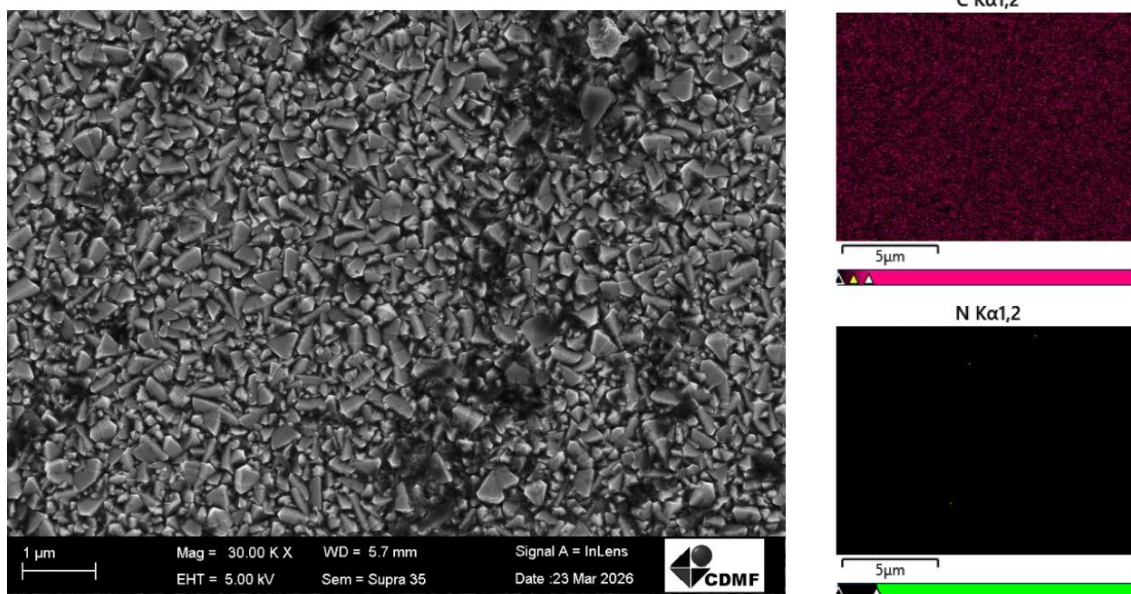

**Figure S5:** SEM images of PCN onto FTO (left) and carbon and nitrogen elemental mapping obtained by SEM/EDS (right).

#### 4 – Electrochemical Characterization

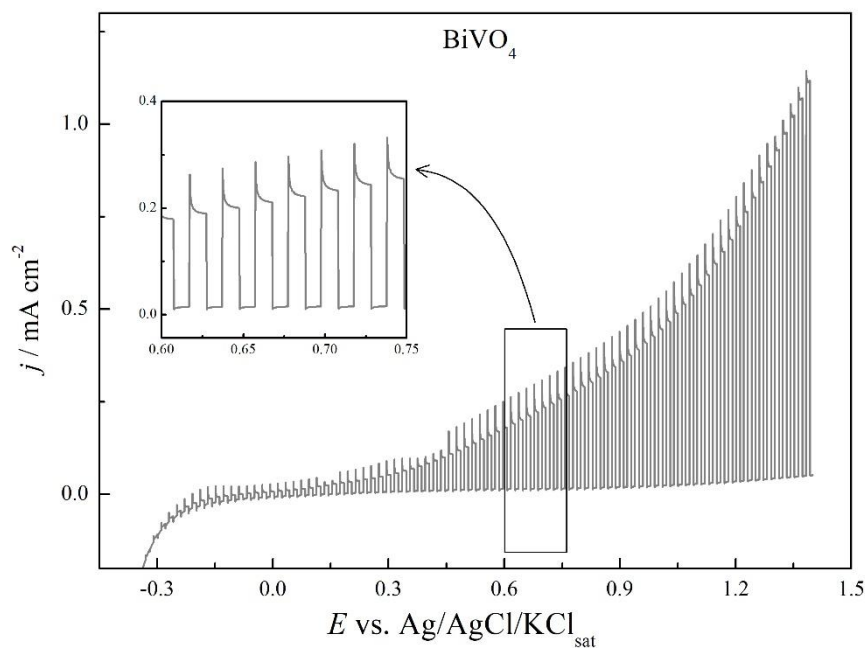

**Figure S6:** Linear sweep voltammetry (LSV) at 0.05 V·s<sup>-1</sup> on chopped illumination for the BiVO<sub>4</sub> film. Solution condition: Na<sub>2</sub>SO<sub>4</sub> (0.5 mol·L<sup>-1</sup>, pH 6.8).

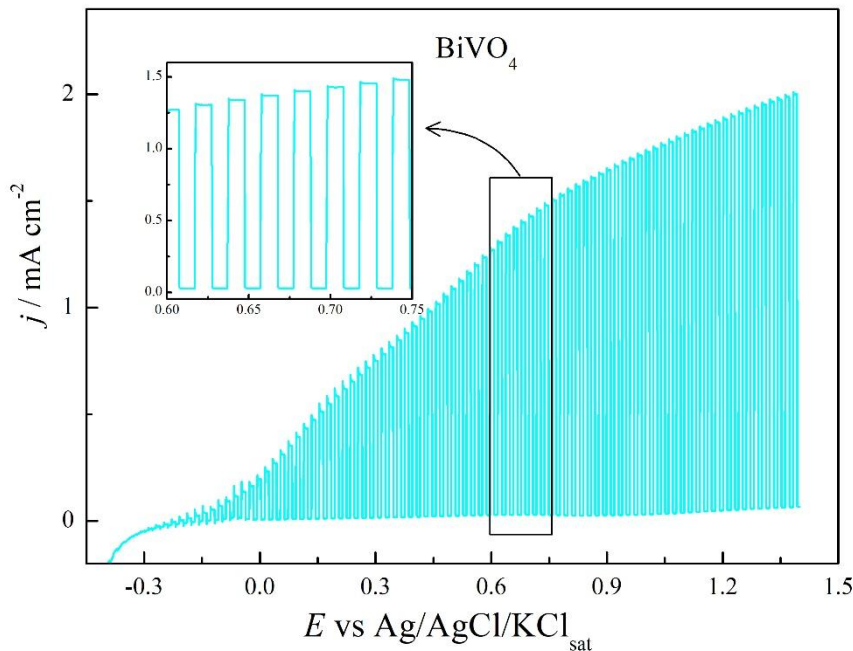

**Figure S7:** LSV at 0.05 V·s<sup>-1</sup> on chopped illumination for the BiVO<sub>4</sub> film. Solution condition: Na<sub>2</sub>SO<sub>4</sub> (0.5 mol·L<sup>-1</sup>, pH 6.8) + glycerol (1.0 mol·L<sup>-1</sup>).

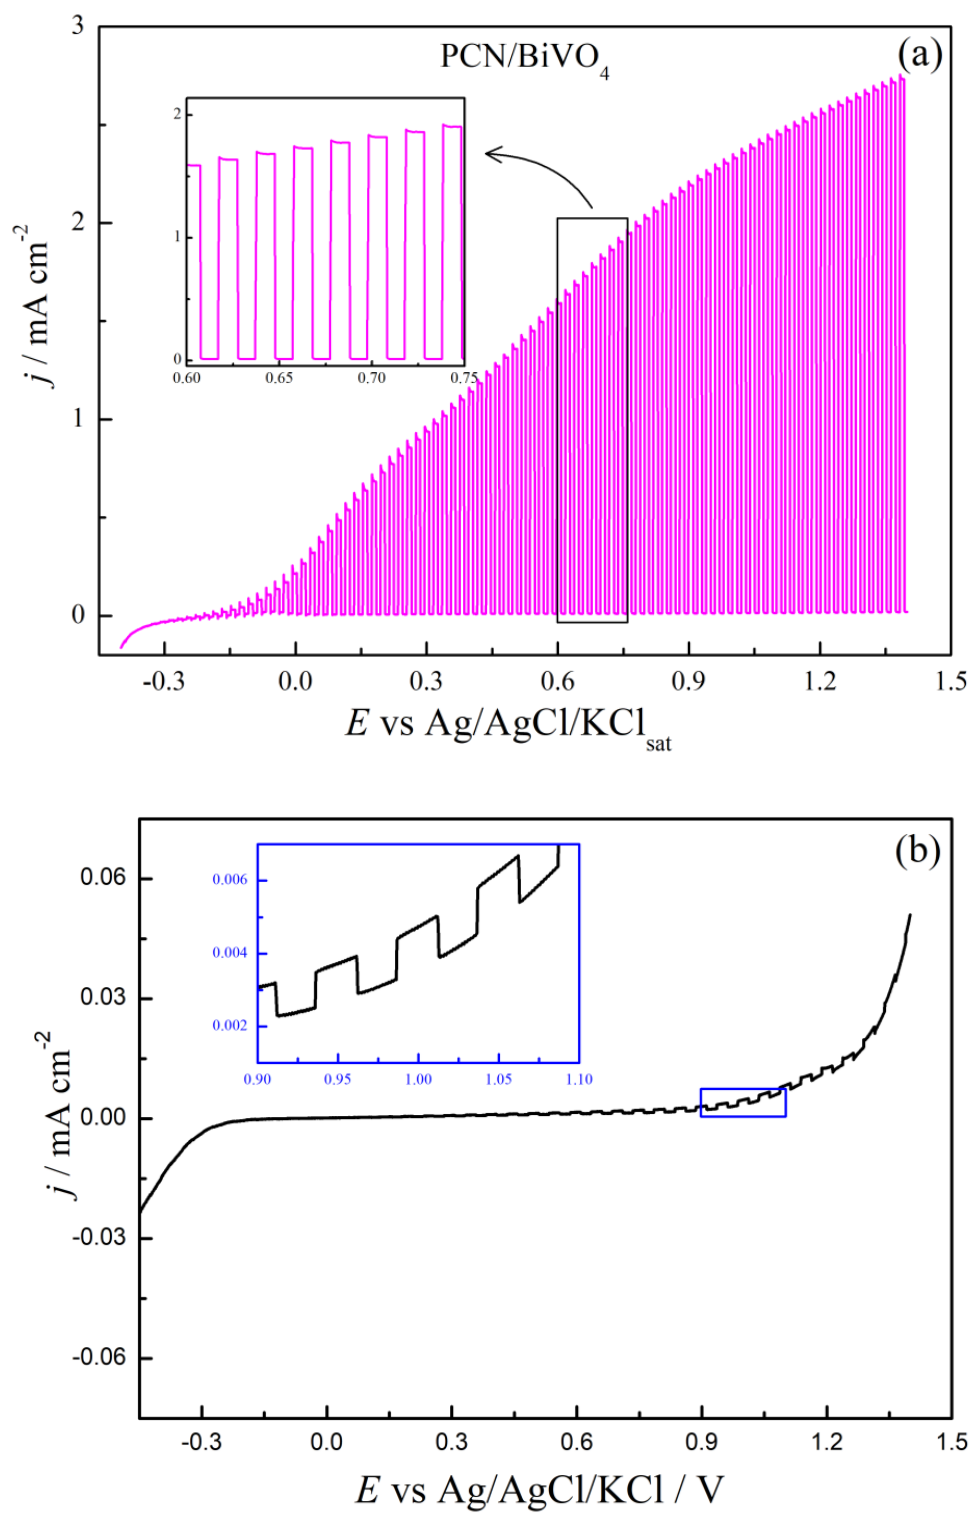

**Figure S8:** LSV at  $0.05 \text{ V}\cdot\text{s}^{-1}$  on chopped illumination for PCN/BiVO<sub>4</sub> (a) and for PCN films (b). Solution condition: Na<sub>2</sub>SO<sub>4</sub> ( $0.5 \text{ mol}\cdot\text{L}^{-1}$ , pH 6.8) + glycerol ( $1.0 \text{ mol}\cdot\text{L}^{-1}$ ).

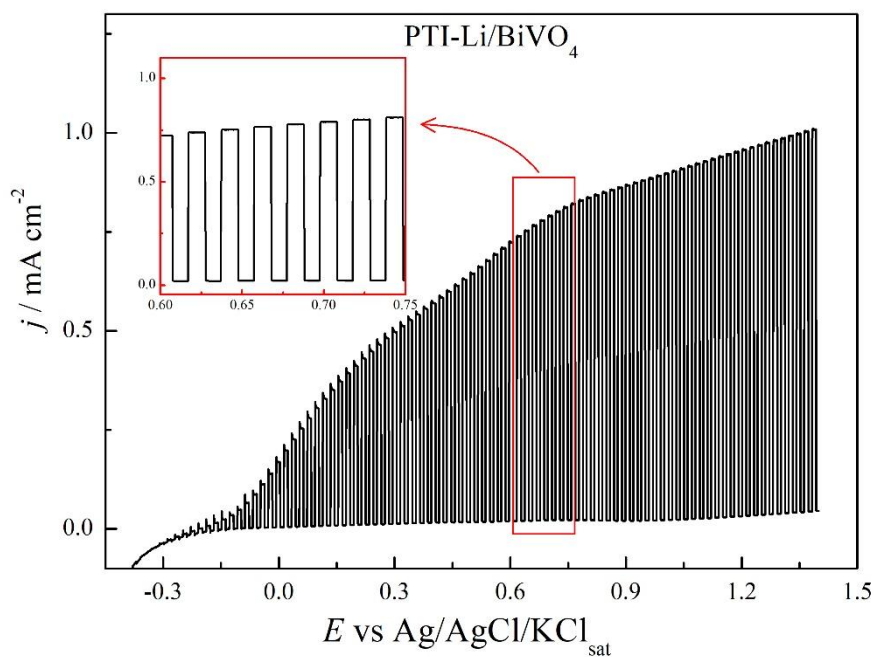

**Figure S9:** LSV at  $0.05 \text{ V}\cdot\text{s}^{-1}$  on chopped illumination for the PTI-Li/BiVO<sub>4</sub> film. Solution condition: Na<sub>2</sub>SO<sub>4</sub> ( $0.5 \text{ mol}\cdot\text{L}^{-1}$ , pH 6.8) + glycerol ( $1.0 \text{ mol}\cdot\text{L}^{-1}$ ).

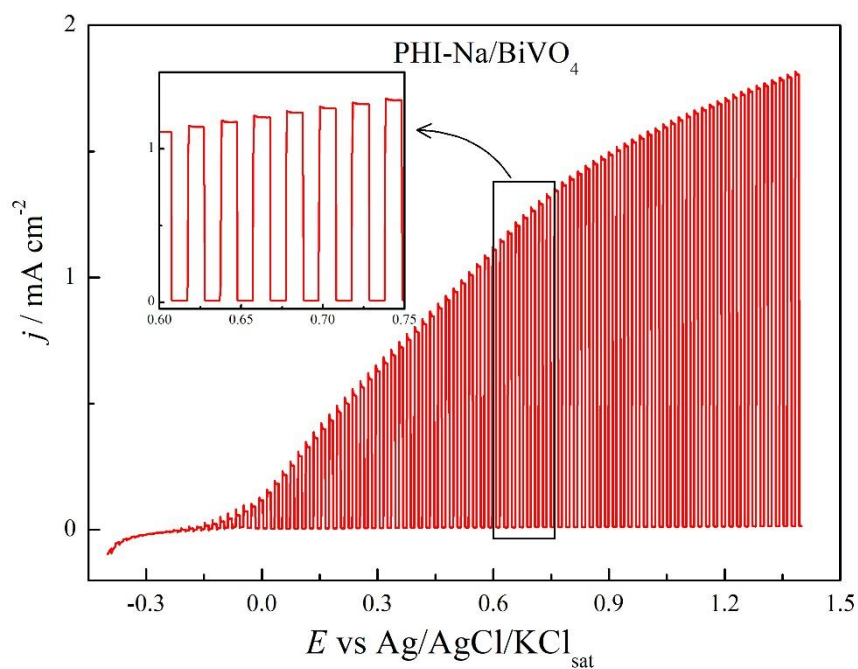

**Figure S10:** LSV at  $0.05 \text{ V}\cdot\text{s}^{-1}$  on chopped illumination for the PHI-Na/BiVO<sub>4</sub> film. Solution condition: Na<sub>2</sub>SO<sub>4</sub> ( $0.5 \text{ mol}\cdot\text{L}^{-1}$ , pH 6.8) + glycerol ( $1.0 \text{ mol}\cdot\text{L}^{-1}$ ).

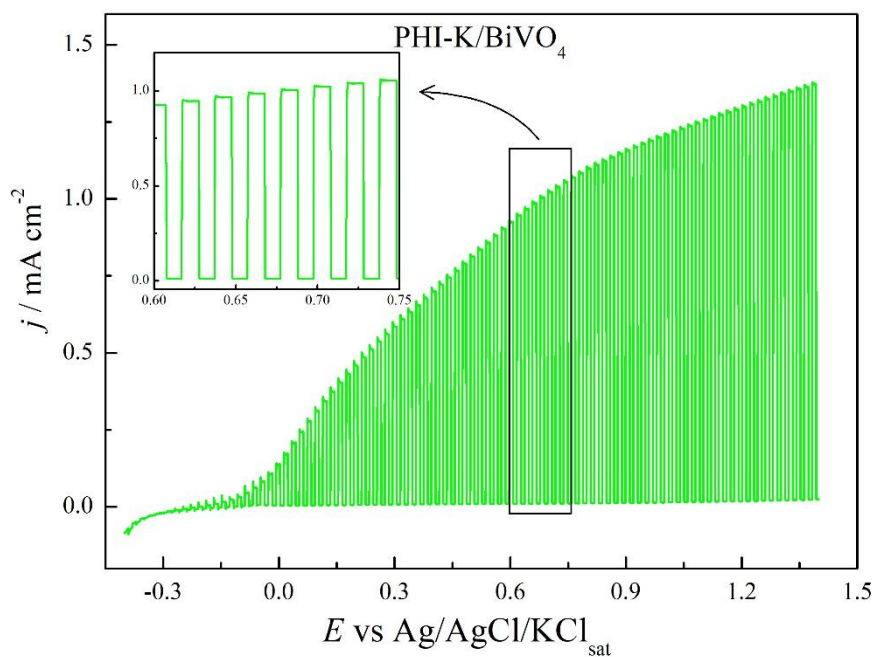

**Figure S11:** LSV at  $0.05 \text{ V}\cdot\text{s}^{-1}$  on chopped illumination for the PHI-K/BiVO<sub>4</sub> film. Solution condition: Na<sub>2</sub>SO<sub>4</sub> ( $0.5 \text{ mol}\cdot\text{L}^{-1}$ , pH 6.8) + glycerol ( $1.0 \text{ mol}\cdot\text{L}^{-1}$ ).

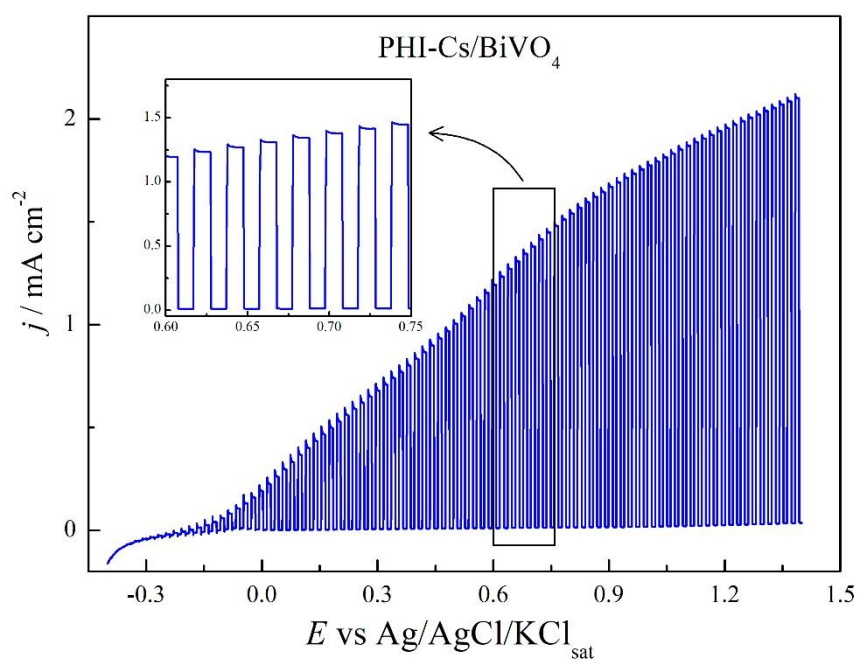

**Figure S12:** LSV at  $0.05 \text{ V}\cdot\text{s}^{-1}$  on chopped illumination for the PHI-Cs/BiVO<sub>4</sub> film. Solution condition: Na<sub>2</sub>SO<sub>4</sub> ( $0.5 \text{ mol}\cdot\text{L}^{-1}$ , pH 6.8) + glycerol ( $1.0 \text{ mol}\cdot\text{L}^{-1}$ ).

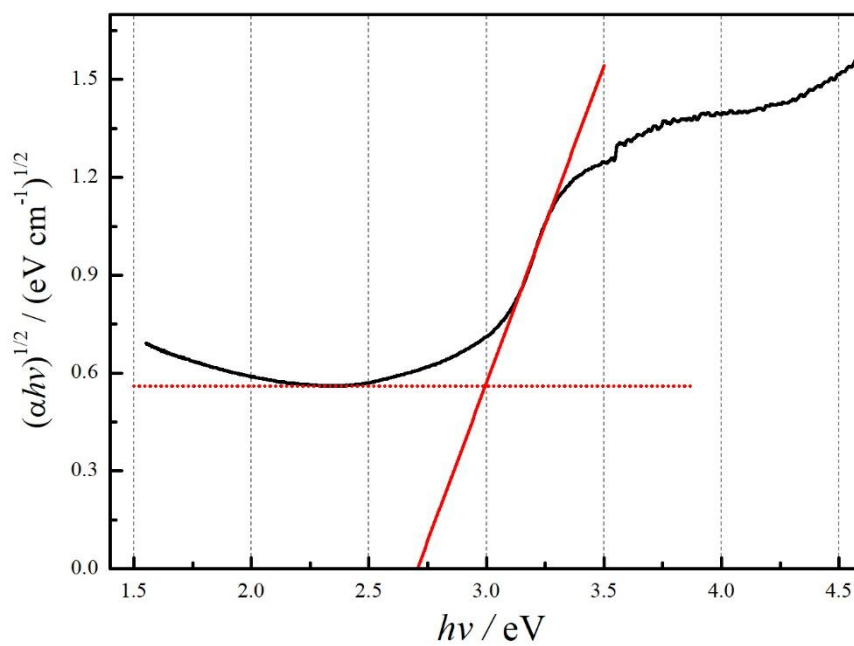

**Figure S13:** Tauc plot from UV-vis spectrum for PTI-Li after thermal treatment at 500 °C for 2 h.
